# Supplementary material for: Visible-light mediated synthesis of main-chain-type semifluorinated alternating terpolymers by NaI catalyzed START polymerization
Source: Royal Society of Chemistry journal article supplement (doi:10.1039/d3py00710c), 2023-01-01
Supplement: d3py00710c1.pdf [file d3py00710c1.pdf]

## Supporting information

### Visible-Light Mediated Synthesis of Main-Chain-Type Semifluorinated Alternating Terpolymers by NaI Catalyzed START Polymerization

*Chaojie Li,<sup>a</sup> Jiannan Cheng,<sup>a</sup> Yi Zhang,<sup>a</sup> Qing Yu,<sup>a</sup> Zhiru Yuan,<sup>a</sup> Weiwei He,<sup>\*b</sup> Xiaoguang Bao,<sup>a</sup> Lifan Zhang,<sup>\*a</sup> and  
Zhenping Cheng<sup>\*a</sup>*

<sup>a</sup>State and Local Joint Engineering Laboratory for Novel Functional Polymeric Materials; Jiangsu Key Laboratory of Advanced Functional Polymer Design and Application; Suzhou key Laboratory of Macromolecular Design and Precision Synthesis; College of Chemistry, Chemical Engineering and Materials Science, Soochow University, Suzhou 215123, China.

<sup>b</sup>State Key Laboratory of Radiation Medicine and Protection, School of Radiological and Interdisciplinary Sciences (RADX), Soochow University, Collaborative Innovation Center of Radiological Medicine of Jiangsu Higher Education Institutions, Suzhou 215123, China

#### Table of contents

#### S1 Synthesis of monomers

#### S2 Polymerization kinetics

#### S3 Additional tables and figures

#### S4 References

## S1 Synthesis of monomers

### Synthesis of $\alpha$ , $\omega$ -unconjugated dienes<sup>1,2</sup>

**Synthesis of 1,4-diprop-2-enoxybenzene (B2-1).** Under an inert atmosphere, a mixture of hydroquinone (5.0 g, 45.5 mmol), allyl bromide (16.5 g, 136.5 mmol), anhydrous potassium carbonate (12.5 g, 91.0 mmol), and dried acetone (100 mL) were added to a 250 mL three-necked round flask, which was refluxed for 12 h and cooled to room temperature. After removing the potassium carbonate by filtration, the solvent was removed by rotary evaporation. The crude solid product was dissolved in ethyl acetate (150 mL) and then washed three times with 50 mL of deionized water to collect the organic layer. Then the organic layer was dried over sodium sulfate and filtered to remove the sodium sulfate. The solvent was evaporated, and the crude product was purified by column chromatography (silica gel, ethyl acetate/petroleum ether = 1/10, v/v) to obtain a white solid (7.86 g, 41.4 mmol, 91.0%). <sup>1</sup>H NMR spectrum of B2-1 was shown in **Figure S1**. <sup>1</sup>H NMR (CDCl<sub>3</sub>, 300 MHz),  $\delta$  ppm: 6.85 (s, 4H), 6.11-5.98 (m, 2H), 5.43-5.24 (m, 4H), 4.50-4.47 (d, 4H).

**Synthesis of 1,4-bis (but-3-en-1-yloxy) benzene (B2-2).** Under an inert atmosphere, a mixture of hydroquinone (1.1 g, 10.0 mmol), 4-bromo-1-butene (3.38 g, 25.0 mmol), anhydrous potassium carbonate (6.21 g, 45.0 mmol), and dried acetonitrile (100 mL) were added to a 250 mL three-necked round flask, which was refluxed for 36 h and cooled to room temperature. After removing the potassium carbonate by filtration, the solvent was removed by rotary evaporation. The crude solid product was dissolved in ethyl acetate (150 mL) and then washed thrice with 50 mL of deionized water to collect the organic layer. The organic layer was dried over sodium sulfate and vacuum filtered to remove sodium sulfate. Then the solvent was evaporated, and the crude product was purified by column chromatography (silica gel, ethyl acetate/petroleum ether = 1/10, v/v) to obtain a primrose yellow solid (1.72 g, 7.9 mmol, 61.9%). <sup>1</sup>H NMR spectrum of B2-2 was shown in **Figure S2**. <sup>1</sup>H NMR (CDCl<sub>3</sub>, 300 MHz),  $\delta$  ppm: 6.83 (s, 4H), 5.97-5.83 (m, 2H), 5.19-5.03 (m, 4H), 3.99-3.94 (t, 4H), 2.56-2.48 (m, 4H).

**Synthesis of 1,4-bis (pent-4-en-1-yloxy) benzene (B2-3).** Under an inert atmosphere, a mixture of hydroquinone (1.1 g, 10.0 mmol), 5-bromo-1-pentene (3.73 g, 25.0 mmol), anhydrous potassium carbonate (6.21 g, 45.0 mmol), and dried acetonitrile (100 mL) was added to a 250 mL three-necked round flask, which was refluxed for 24 h and cooled down to room temperature. After removal of potassium carbonate by filtration, the solvent was removed via rotary evaporation. The crude solid product was dissolved in ethyl acetate (150 mL), which was then wash thrice with 50 mL of deionized water, and the organic layer was collected. The organic layer was dried over sodium sulfate and vacuum filtered to remove sodium sulfate. Then the solvent was evaporated, and the crude product was purified by column chromatography (silica gel, ethyl acetate/petroleum ether = 1/10, v/v) to obtain a white solid (1.02 g, 4.1 mmol, 41.5%). <sup>1</sup>H NMR spectrum of B2-3 was shown in **Figure S3**.

$^1\text{H}$  NMR ( $\text{CDCl}_3$ , 300 MHz),  $\delta$  ppm: 6.84 (s, 4H), 5.92-5.81 (m, 2H), 5.11-5.00 (m, 4H), 3.96-3.92 (t, 4H), 2.27-2.24 (m, 4H), 1.91-1.86 (m, 4H).

**Synthesis of 1,4-bis (hex-5-en-1-yloxy) benzene (B2-4).** Under an inert atmosphere, a mixture of hydroquinone (5.5 g, 50.0 mmol), 6-bromo-1-hexene (4.07 g, 125.0 mmol), anhydrous potassium carbonate (31.1 g, 225.0 mmol), and dried acetonitrile (100 mL) was added to a 250 mL three-necked round flask, which was refluxed for 48 h and cooled down to room temperature. After removal of potassium carbonate by filtration, the solvent was removed via rotary evaporation. The crude solid product was dissolved in ethyl acetate (150 mL), which was then washed thrice with 50 mL of deionized water, and the organic layer was collected. The organic layer was dried over sodium sulfate and vacuum filtered to remove sodium sulfate. Then the solvent was evaporated, and the crude product was purified by column chromatography (silica gel, ethyl acetate/petroleum ether = 1/10, v/v) to obtain a white solid (10.78 g, 39.3 mmol, 78.6%).  $^1\text{H}$  NMR spectrum of B2-4 was shown in **Figure S4**.  $^1\text{H}$  NMR ( $\text{CDCl}_3$ , 300 MHz),  $\delta$  ppm: 6.81 (s, 4H), 5.89-5.76 (m, 2H), 5.06-4.94 (m, 4H), 3.93-3.89 (t, 4H), 2.16-2.08 (m, 4H), 1.82-1.73 (m, 4H), 1.61-1.51 (m, 4H).

## S2 Polymerization kinetics

**Kinetic studies of the START terpolymerization with  $[\text{B1-1}]_0/[\text{B2-2}]_0 = 1/1$ .** A typical polymerization procedure is as follows: A mixture of monomers (A, B1-1 and B2-2), NaI ( $[\text{A}]_0/[\text{B1-1}]_0/[\text{B2-2}]_0/[\text{NaI}]_0 = 1/0.5/0.5/9$ ,  $[\text{A}]_0 = 0.25$  mmol), and acetone (2 mL) was prepared in a clean 5 mL ampoule with a stir bar. The mixture was deoxygenated by four freeze-pump-thaw cycles under  $\text{N}_2$  atmosphere, and the ampoule was immediately sealed by flame. Then, the mixture was stirred under irradiation with purple light LED light ( $\lambda_{\text{max}} = 403$  nm,  $29.7$  mW  $\text{cm}^{-2}$ ) while cooled with  $10$  °C circulating water and an electric fan to maintain room temperature. At the desired exposure time 4, 5, 7, 10, 15, 21, and 34 h, the obtained products were analyzed by  $^1\text{H}$  NMR and GPC.

**Kinetic studies of the START terpolymerization with  $[\text{B1-1}]_0/[\text{B2-2}]_0 = 2/1$ .** A typical polymerization procedure is as follows: A mixture of monomers (A, B1-1 and B2-2), NaI ( $[\text{A}]_0/[\text{B1-1}]_0/[\text{B2-2}]_0/[\text{NaI}]_0 = 1/0.67/0.33/9$ ,  $[\text{A}]_0 = 0.25$  mmol), and acetone (2 mL) was prepared in a clean 5 mL ampoule with a stir bar. The mixture was deoxygenated by four freeze-pump-thaw cycles under  $\text{N}_2$  atmosphere, and the ampoule was immediately sealed by flame. Then, the mixture was stirred under irradiation with purple light LED light ( $\lambda_{\text{max}} = 403$  nm,  $29.7$  mW  $\text{cm}^{-2}$ ) while cooled with  $10$  °C circulating water and an electric fan to maintain room temperature. At the desired exposure time of 3, 4, 6, 8, 12 and 16 h, the obtained products were analyzed by  $^1\text{H}$  NMR and GPC.

**Kinetic studies of the START terpolymerization with  $[\text{B1-1}]_0/[\text{B2-2}]_0 = 1/2$ .** A typical polymerization procedure is as follows: A mixture of monomers (A, B1-1 and B2-2), NaI ( $[\text{A}]_0/[\text{B1-1}]_0/[\text{B2-2}]_0/[\text{NaI}]_0 = 1/0.33/0.67/9$ ,  $[\text{A}]_0 = 0.25$  mmol), and acetone (2 mL) was prepared in a clean 5

mL ampoule with a stir bar. The mixture was deoxygenated by four freeze-pump-thaw cycles under N<sub>2</sub> atmosphere, and the ampoule was immediately sealed by flame. Then, the mixture was stirred under irradiation with purple light LED light ( $\lambda_{\text{max}} = 403 \text{ nm}$ ,  $29.7 \text{ mW cm}^{-2}$ ) while cooled with 10 °C circulating water and an electric fan to maintain room temperature. At the desired exposure time 5, 6, 8, 12 and 16 h, the obtained products were analyzed by <sup>1</sup>H NMR and GPC.

### S3 Additional tables and figures

**Table S1.** Effect of catalysts on START terpolymerization.<sup>a</sup>

| Entry | Catalyst          | Yield <sup>b</sup><br>(%) | $M_{n,\text{GPC}}^c$<br>(g mol <sup>-1</sup> ) | $M_{n,\text{NMR}}^d$<br>(g mol <sup>-1</sup> ) | $\bar{D}^c$ | $n_{\text{B1-1}}/n_{\text{B2-2}}^e$ |
|-------|-------------------|---------------------------|------------------------------------------------|------------------------------------------------|-------------|-------------------------------------|
| 1     | TMEDA             | 31.6                      | 8600                                           | 5100                                           | 1.56        | 0.98/1                              |
| 2     | Et <sub>3</sub> N | 62.8                      | 8600                                           | 10300                                          | 1.49        | 0.89/1                              |
| 3     | DMBA              | 73.8                      | 8700                                           | 9900                                           | 1.45        | 0.96/1                              |
| 4     | TBAI              | 33.2                      | 4300                                           | 3900                                           | 1.15        | 0.97/1                              |
| 5     | NaI               | 32.1                      | 3800                                           | 3500                                           | 1.13        | 0.92/1                              |

<sup>a</sup>Feed molar ratio  $R = [\text{A}]_0/[\text{B1-1}]_0/[\text{B2-2}]_0/[\text{Catalyst}]_0 = 1/0.5/0.5/0.4$ , time = 23 h. <sup>b</sup>Determined by gravimetry. <sup>c</sup>Determined by GPC using PMMA as the standard in THF. <sup>d</sup>Determined by <sup>1</sup>H NMR results. <sup>e</sup>Calculated molar ratio in polymers determined by <sup>1</sup>H NMR results.

**Table S2.** Effect of dose of NaI on START terpolymerization.<sup>a</sup>

| Entry | X    | Yield <sup>b</sup><br>(%) | $M_{n,GPC}$ <sup>c</sup><br>(g mol <sup>-1</sup> ) | $M_{n,NMR}$ <sup>d</sup><br>(g mol <sup>-1</sup> ) | $\mathcal{D}$ <sup>c</sup> | $n_{B1-1}/n_{B2-2}$ <sup>e</sup> |
|-------|------|---------------------------|----------------------------------------------------|----------------------------------------------------|----------------------------|----------------------------------|
| 1     | 0    | 0                         | --f                                                | --f                                                | --f                        | --f                              |
| 2     | 0.4  | 32.1                      | 3800                                               | 3500                                               | 1.13                       | 0.92/1                           |
| 3     | 2.0  | 34.3                      | 4400                                               | 4300                                               | 1.17                       | 0.88/1                           |
| 4     | 5.0  | 42.1                      | 4500                                               | 4300                                               | 1.18                       | 0.92/1                           |
| 5     | 9.0  | 55.7                      | 5100                                               | 5300                                               | 1.25                       | 1.02/1                           |
| 6     | 12.0 | 56.6                      | 5400                                               | 5700                                               | 1.29                       | 0.97/1                           |

<sup>a</sup>Feed molar ratio  $R = [A]_0/[B1-1]_0/[B2-2]_0/[NaI]_0 = 1/0.5/0.5/X$ , time = 23 h. <sup>b</sup>Determined by gravimetry. <sup>c</sup>Determined by GPC using PMMA as the standard in THF. <sup>d</sup>Determined by <sup>1</sup>H NMR results. <sup>e</sup>Calculated molar ratio in polymers determined by <sup>1</sup>H NMR results. <sup>f</sup>Not available.

**Table S3.** Experimental results of binary polymerization by START. <sup>a</sup>

| Entry | A/B    | Yield <sup>b</sup><br>(%) | $M_{n,GPC}$ <sup>c</sup><br>(g mol <sup>-1</sup> ) | $M_{n,NMR}$ <sup>d</sup><br>(g mol <sup>-1</sup> ) | $\mathcal{D}$ <sup>c</sup> |
|-------|--------|---------------------------|----------------------------------------------------|----------------------------------------------------|----------------------------|
| S1    | A/B1-1 | 58.6                      | 5600                                               | 6600                                               | 2.50                       |
| S2    | A/B2-2 | 71.5                      | 6100                                               | 5000                                               | 2.14                       |
| S3    | A/B2-3 | 70.4                      | 5800                                               | 3000                                               | 3.12                       |
| S4    | A/B2-4 | 56.6                      | 5700                                               | 4600                                               | 2.29                       |

<sup>a</sup>Feed molar ratio  $R = [A]_0/[B]_0/[NaI]_0 = 1/1/9$ , time = 23 h. <sup>b</sup>Determined by gravimetry. <sup>c</sup>Determined by GPC using PMMA as the standard in THF. <sup>d</sup>Determined by <sup>1</sup>H NMR results. The GPC curves are shown in Figure S17.

**Table S4.** The Gibbs free energy of chemical reactions (1)-(8) by  $\Delta G = G_p - \Sigma G_m$ .

| Chemical reaction | $\Delta G/\text{kJ mol}^{-1}$ | Chemical reaction | $\Delta G/\text{kJ mol}^{-1}$ |
|-------------------|-------------------------------|-------------------|-------------------------------|
| (1)               | <sup>a</sup> ---              | (5)               | -124.86                       |
| (2)               | -117.32                       | (6)               | -96.37                        |
| (3)               | -109.36                       | (7)               | <sup>a</sup> ---              |
| (4)               | -86.31                        | (8)               | -107.26                       |

The  $G_p$ ,  $G_m$  calculation was performed using Gaussian 16. For the chemical reactions (1)-(8), the C, H, O, and F atoms were treated with the split-valence 6-31G(d,p) basis set, while the I atom was described by the Stuttgart effective core potential. <sup>a</sup>not available.

**Table S5.** Kinetic studies of the START terpolymerization with  $[\text{B1-1}]_0/[\text{B2-2}]_0 = 1/1$ .<sup>a</sup>

| Entry | Time (h) | Yield <sup>b</sup> (%) | $M_{n,\text{GPC}}^c$ (g mol <sup>-1</sup> ) | $M_{n,\text{NMR}}^d$ (g mol <sup>-1</sup> ) | $\mathcal{D}^c$ | $n_{\text{B1-1}}/n_{\text{B2-2}}^e$ |
|-------|----------|------------------------|---------------------------------------------|---------------------------------------------|-----------------|-------------------------------------|
| 1     | 4        | 8.6                    | 3000                                        | 3400                                        | 1.13            | 1.00/1                              |
| 2     | 5        | 14.3                   | 3000                                        | 3100                                        | 1.15            | 1.10/1                              |
| 3     | 7        | 20.8                   | 4300                                        | 4600                                        | 1.21            | 0.96/1                              |
| 4     | 10       | 41.2                   | 4700                                        | 4800                                        | 1.30            | 1.02/1                              |
| 5     | 15       | 52.0                   | 5200                                        | 5300                                        | 1.36            | 1.03/1                              |
| 6     | 21       | 55.7                   | 5300                                        | 4700                                        | 1.31            | 1.08/1                              |
| 7     | 34       | 65.9                   | 6100                                        | 5800                                        | 1.29            | 1.03/1                              |

<sup>a</sup>Feed molar ratio  $R = [\text{A}]_0/[\text{B1-1}]_0/[\text{B2-2}]_0/[\text{NaI}]_0 = 1/0.5/0.5/9$ . <sup>b</sup>Determined by gravimetry.

<sup>c</sup>Determined by GPC using PMMA as the standard in THF. <sup>d</sup>Determined by <sup>1</sup>H NMR results.

<sup>e</sup>Calculated molar ratio in polymers determined by <sup>1</sup>H NMR results.

**Table S6.** Kinetic studies of the START terpolymerization with  $[B1-1]_0/[B2-2]_0 = 2/1$ .<sup>a</sup>

| Entry | Time (h) | Yield <sup>b</sup> (%) | $M_{n,GPC}$ <sup>c</sup> (g mol <sup>-1</sup> ) | $M_{n,NMR}$ <sup>d</sup> (g mol <sup>-1</sup> ) | $\bar{D}$ <sup>c</sup> | $n_{B1-1}/n_{B2-2}$ <sup>e</sup> |
|-------|----------|------------------------|-------------------------------------------------|-------------------------------------------------|------------------------|----------------------------------|
| 1     | 3        | 13.8                   | 3600                                            | 3900                                            | 1.14                   | 1.29/1                           |
| 2     | 4        | 22.8                   | 3700                                            | 3800                                            | 1.14                   | 1.46/1                           |
| 3     | 6        | 30.3                   | 4100                                            | 3900                                            | 1.15                   | 1.61/1                           |
| 4     | 8        | 36.4                   | 4200                                            | 4600                                            | 1.15                   | 1.84/1                           |
| 5     | 12       | 44.9                   | 4300                                            | 4900                                            | 1.19                   | 2.01/1                           |
| 6     | 16       | 55.6                   | 5400                                            | 5500                                            | 1.26                   | 2.00/1                           |

<sup>a</sup>Feed molar ratio  $R = [A]_0/[B1-1]_0/[B2-2]_0/[NaI]_0 = 1/0.67/0.33/9$ . <sup>b</sup>Determined by gravimetry.

<sup>c</sup>Determined by GPC using PMMA as the standard in THF. <sup>d</sup>Determined by <sup>1</sup>H NMR results.

<sup>e</sup>Calculated molar ratio in polymers determined by <sup>1</sup>H NMR results.

**Table S7.** Kinetic studies of the START terpolymerization with  $[B1-1]_0/[B2-2]_0 = 1/2$ .<sup>a</sup>

| Entry | Time (h) | Yield <sup>b</sup> (%) | $M_{n,GPC}$ <sup>c</sup> (g mol <sup>-1</sup> ) | $M_{n,NMR}$ <sup>d</sup> (g mol <sup>-1</sup> ) | $\bar{D}$ <sup>c</sup> | $n_{B1-1}/n_{B2-2}$ <sup>e</sup> |
|-------|----------|------------------------|-------------------------------------------------|-------------------------------------------------|------------------------|----------------------------------|
| 1     | 5        | 15.0                   | 3300                                            | 3000                                            | 1.14                   | 1/1.48                           |
| 2     | 6        | 20.3                   | 3900                                            | 3800                                            | 1.14                   | 1/1.60                           |
| 3     | 8        | 35.1                   | 4100                                            | 3700                                            | 1.24                   | 1/1.82                           |
| 4     | 12       | 48.5                   | 4300                                            | 3900                                            | 1.26                   | 1/2.01                           |
| 5     | 16       | 53.5                   | 4800                                            | 4500                                            | 1.24                   | 1/2.00                           |

<sup>a</sup>Feed molar ratio  $R = [A]_0/[B1-1]_0/[B2-2]_0/[NaI]_0 = 1/0.33/0.67/9$ . <sup>b</sup>Determined by gravimetry.

<sup>c</sup>Determined by GPC using PMMA as the standard in THF. <sup>d</sup>Determined by <sup>1</sup>H NMR results.

<sup>e</sup>Calculated molar ratio in polymers determined by <sup>1</sup>H NMR results.

**Table S8.** Glass transition temperature ( $T_g$ ) of alternating terpolymers.<sup>a</sup>

| Entry | B1-1/B2-2 | $n_{B1-1}/n_{B2-2}$ <sup>b</sup> | $M_{n,GPC}$ <sup>c</sup><br>(g mol <sup>-1</sup> ) | $\mathcal{D}$ <sup>c</sup> | $T_g$ <sup>d</sup><br>(°C) |
|-------|-----------|----------------------------------|----------------------------------------------------|----------------------------|----------------------------|
| 1     |           | 1/0.55                           | 5500                                               | 1.35                       | 11                         |
| 2     | 1/0.5     | 1/0.53                           | 4100                                               | 1.26                       | 11                         |
| 3     |           | 1/0.42                           | 5400                                               | 1.56                       | 9                          |
| 4     |           | 1/0.93                           | 5300                                               | 1.31                       | 17                         |
| 5     | 1/1       | 1/0.96                           | 5800                                               | 1.37                       | 15                         |
| 6     |           | 1/1.12                           | 4300                                               | 1.24                       | 16                         |
| 7     |           | 1/1.75                           | 5200                                               | 1.37                       | 22                         |
| 8     | 1/2       | 1/1.79                           | 4800                                               | 1.20                       | 24                         |
| 9     |           | 1/1.96                           | 4600                                               | 1.36                       | 22                         |

<sup>a</sup>Feed molar ratio  $R = [A]_0/[B1-1+B2-2]_0/[NaI]_0 = 1/1/9$ , time = 23 h. <sup>b</sup>Calculated molar ratio in polymers determined by <sup>1</sup>H NMR results. <sup>c</sup>Determined by GPC using PMMA as the standard in THF. <sup>d</sup>Determined by DSC.



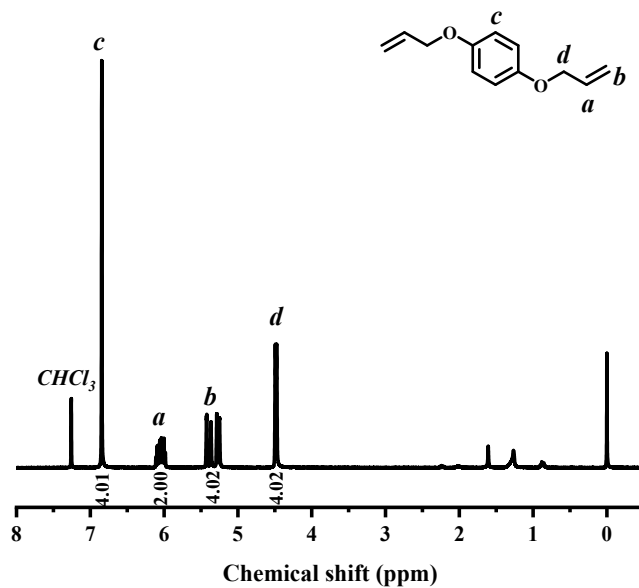

Figure S1. <sup>1</sup>H NMR spectrum of B2-1 in CDCl<sub>3</sub>.

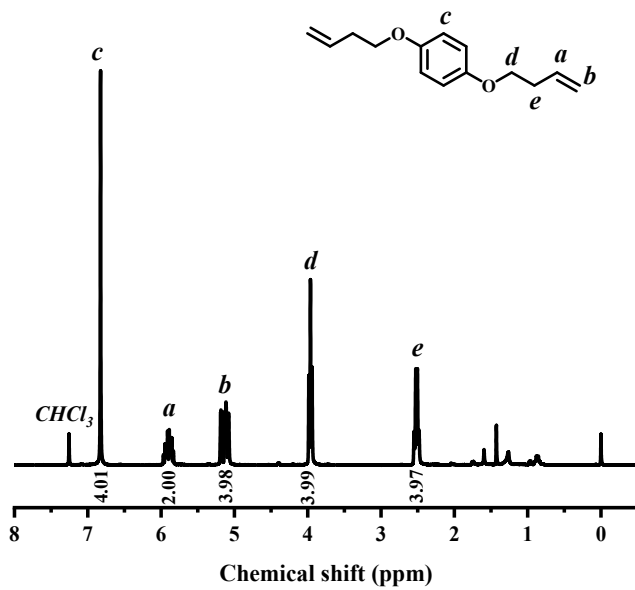

Figure S2. <sup>1</sup>H NMR spectrum of B2-2 in CDCl<sub>3</sub>.

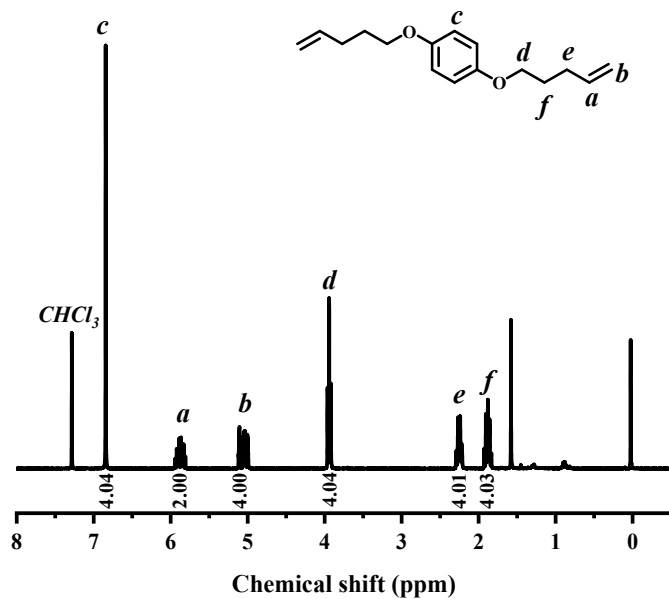

**Figure S3.** <sup>1</sup>H NMR spectrum of **B2-3** in CDCl<sub>3</sub>.

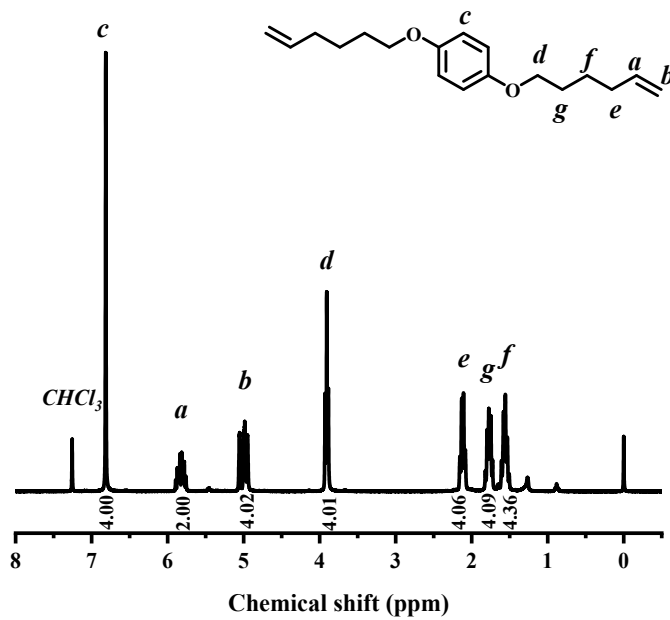

**Figure S4.** <sup>1</sup>H NMR spectrum of **B2-4** in CDCl<sub>3</sub>.

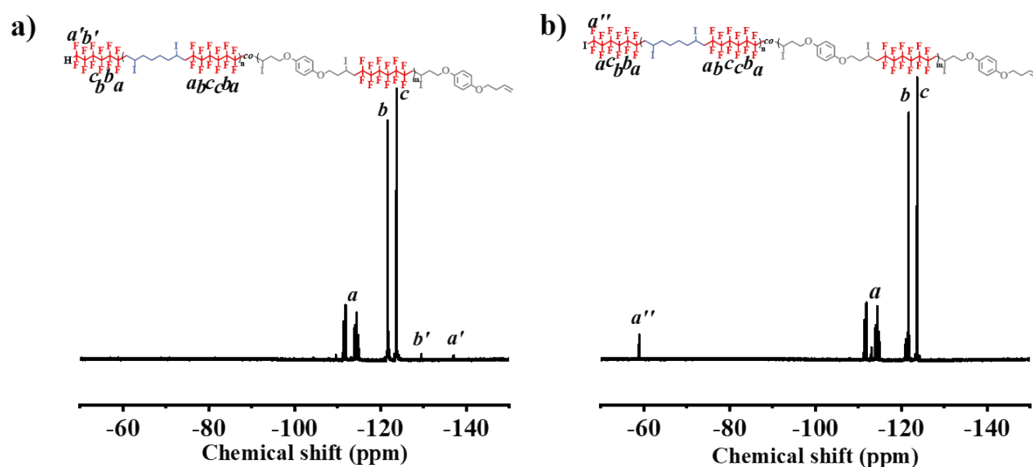

Figure S5.  $^{19}\text{F}$  NMR spectra of SFATs by using a) DMBA and b) NaI as the catalysts in  $\text{CDCl}_3$ .

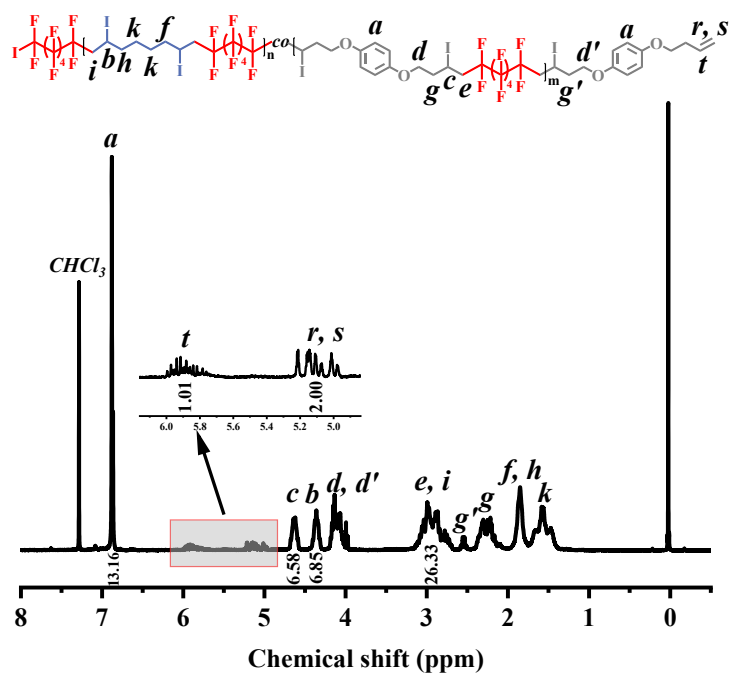

Figure S6.  $^1\text{H}$  NMR spectrum of SFAT-3 shown in Table 1.

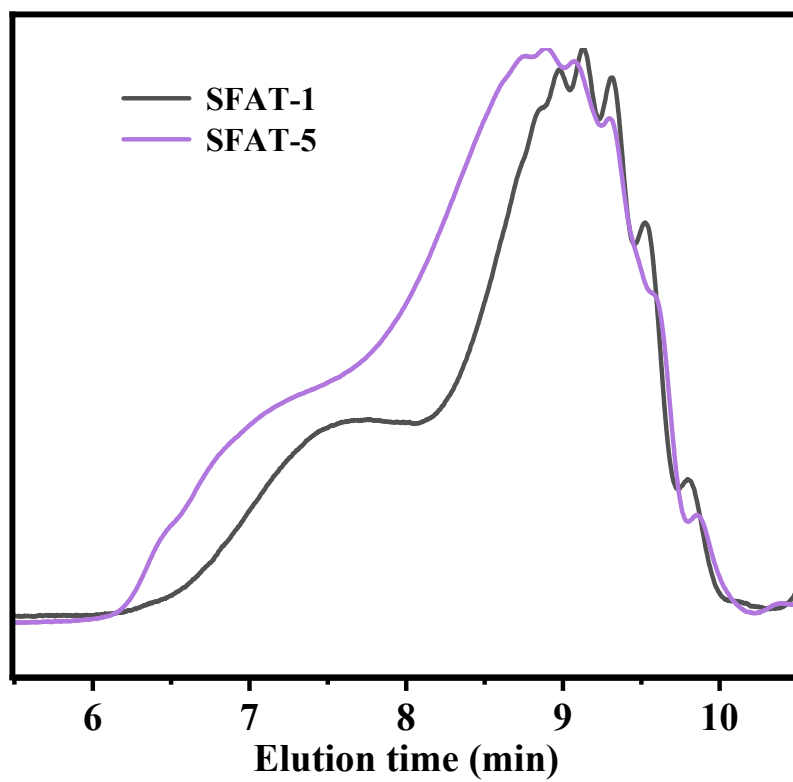

**Figure S7.** GPC curves of SFAT-1 and SFAT-5 shown in Table 1.

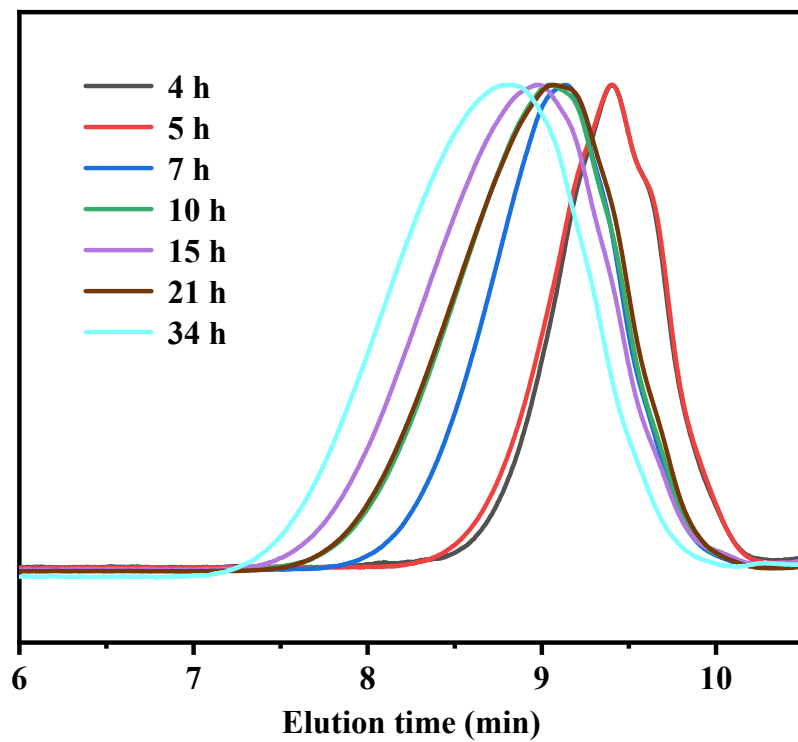

**Figure S8.** GPC curves of terpolymers obtained at  $[B1-1]_0/[B2-2]_0 = 1/1$  during the kinetic investigation.

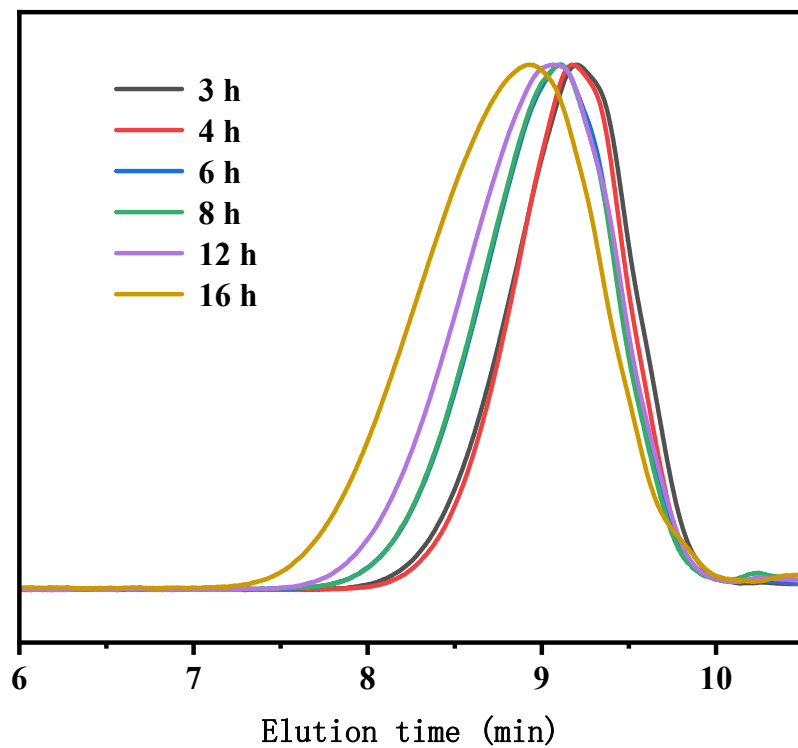

**Figure S9.** GPC curves of terpolymers obtained at  $[B1-1]_0/[B2-2]_0 = 2/1$  during the kinetic investigation.

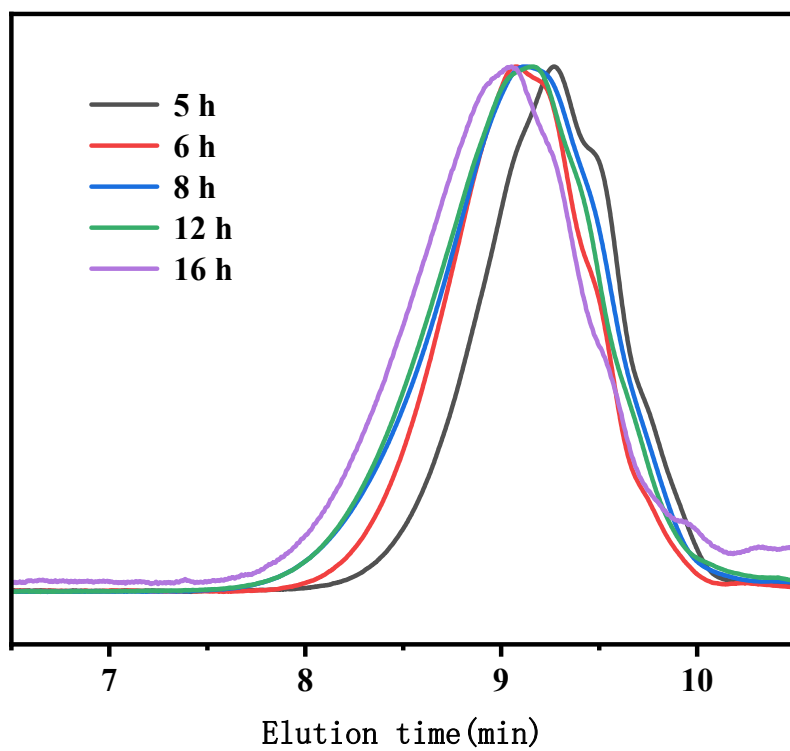

**Figure S10.** GPC curves of terpolymers obtained at  $[B1-1]_0/[B2-2]_0 = 1/2$  during the kinetic investigation.

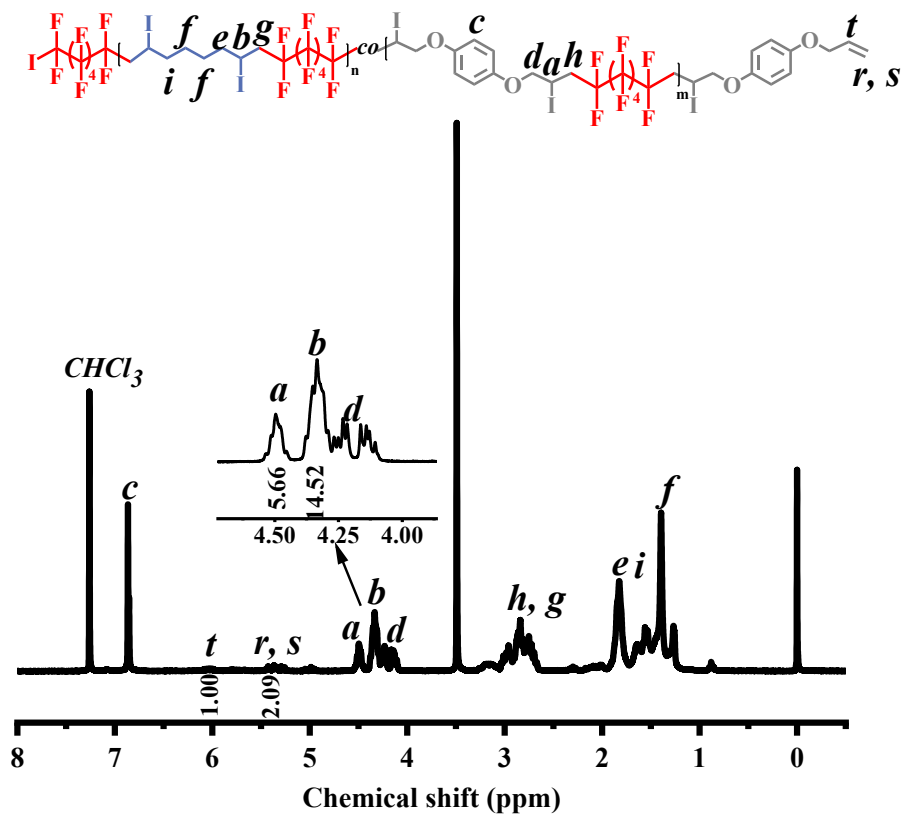

Figure S11.  $^1\text{H NMR}$  spectra of  $(AB1-1)_{7.3}\text{-co-}(AB2-1)_{3.3}$  shown in Table 2.



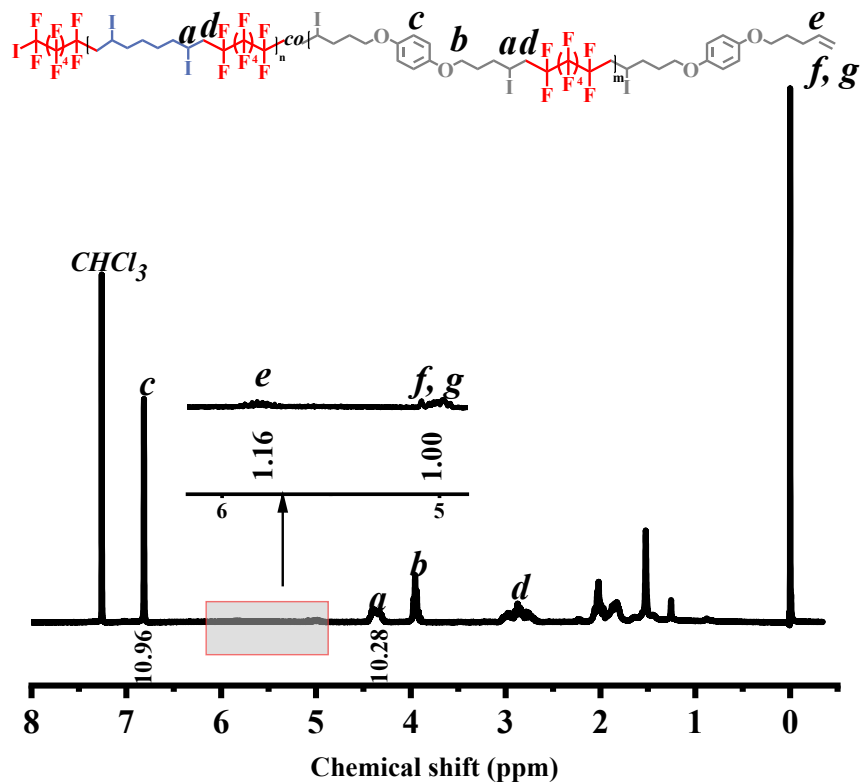

**Figure S12.** <sup>1</sup>H NMR spectra of (AB1-1)<sub>3,0</sub>-co-(AB2-3)<sub>3,2</sub> shown in Table 2.

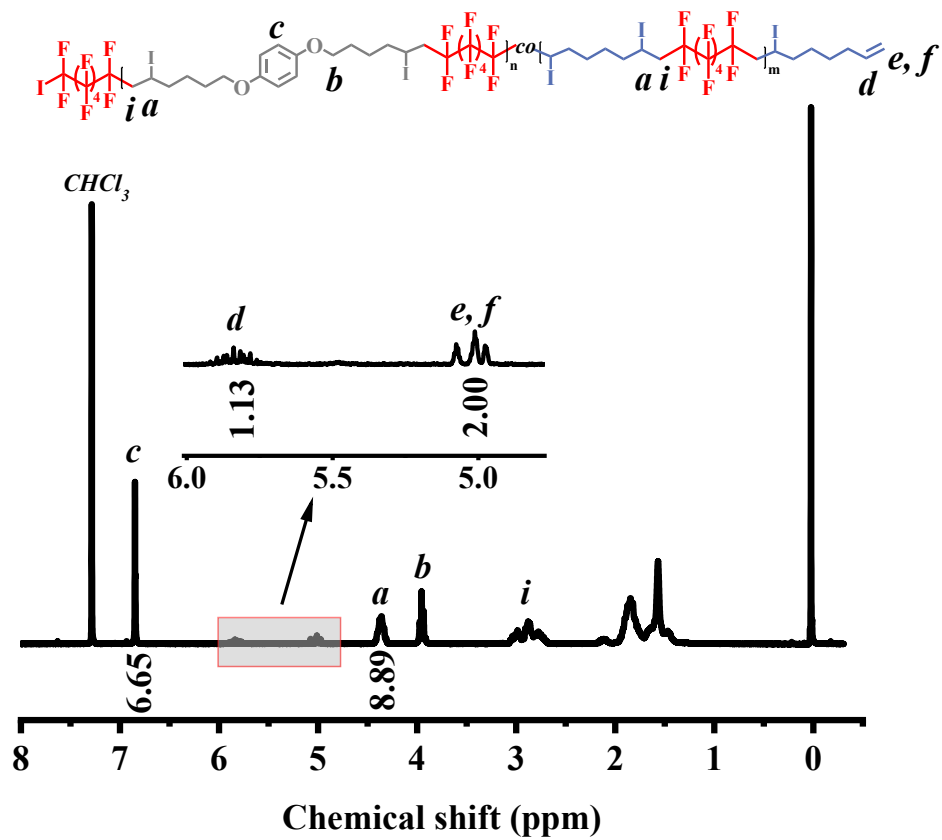

Figure S13. <sup>1</sup>H NMR spectra of (AB1-1)<sub>3,3</sub>-co-(AB2-4)<sub>2,8</sub> shown in Table 2.

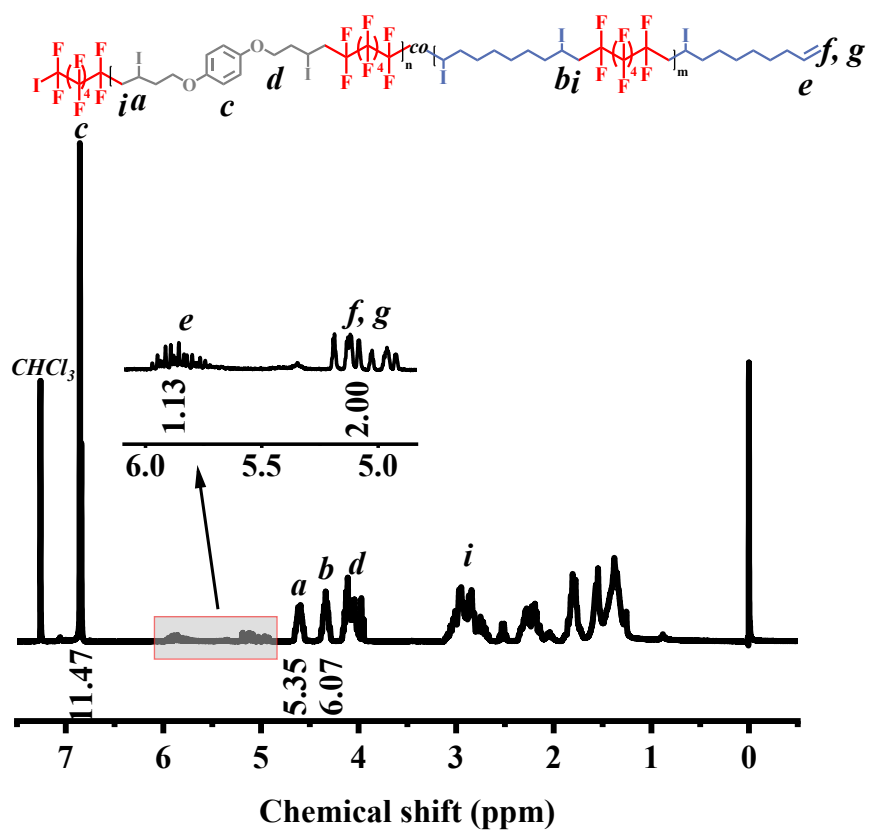

Figure S14.  $^1\text{H NMR}$  spectra of  $(AB1-2)_{3.5}\text{-co-}(AB2-2)_{3.2}$  shown in Table 2.

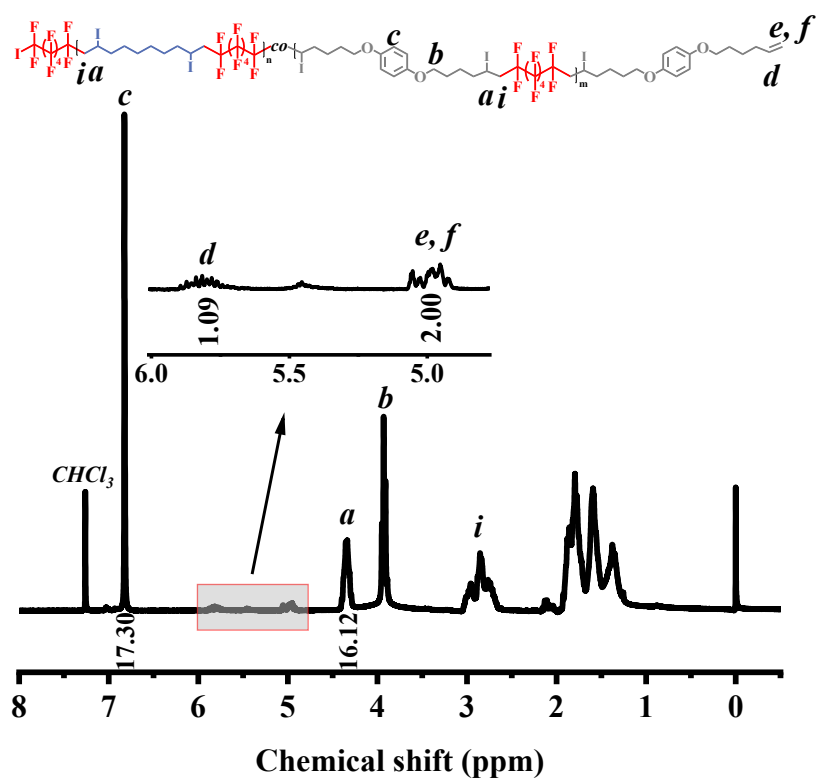

Figure S15.  $^1\text{H}$  NMR spectra of  $(\text{AB1-2})_{4.2}\text{-co-}(\text{AB2-4})_{4.8}$  shown in Table 2.

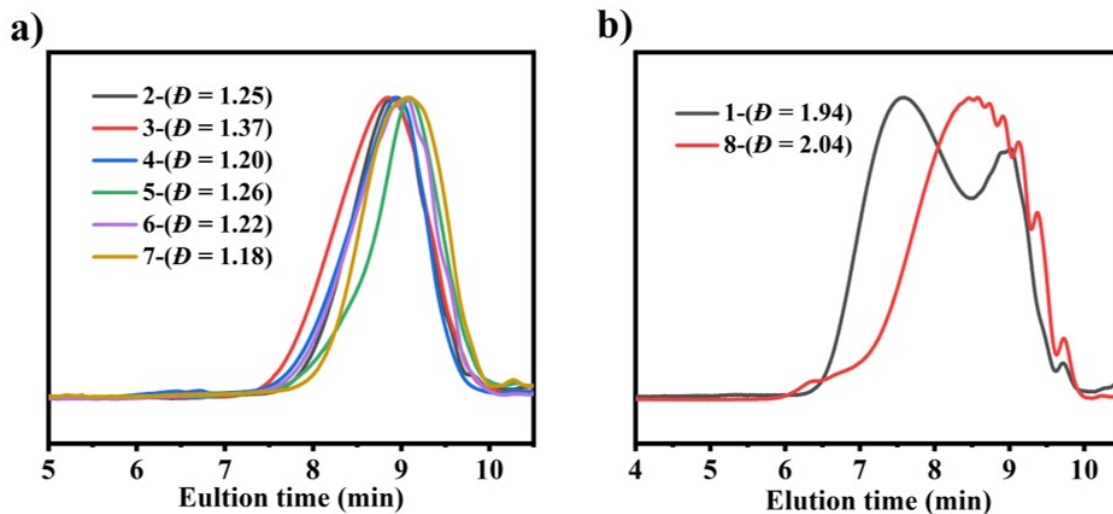

**Figure S16.** GPC curves of terpolymers of a) entries 2-7 and (b) entries 1 and 8 shown in Table 2.

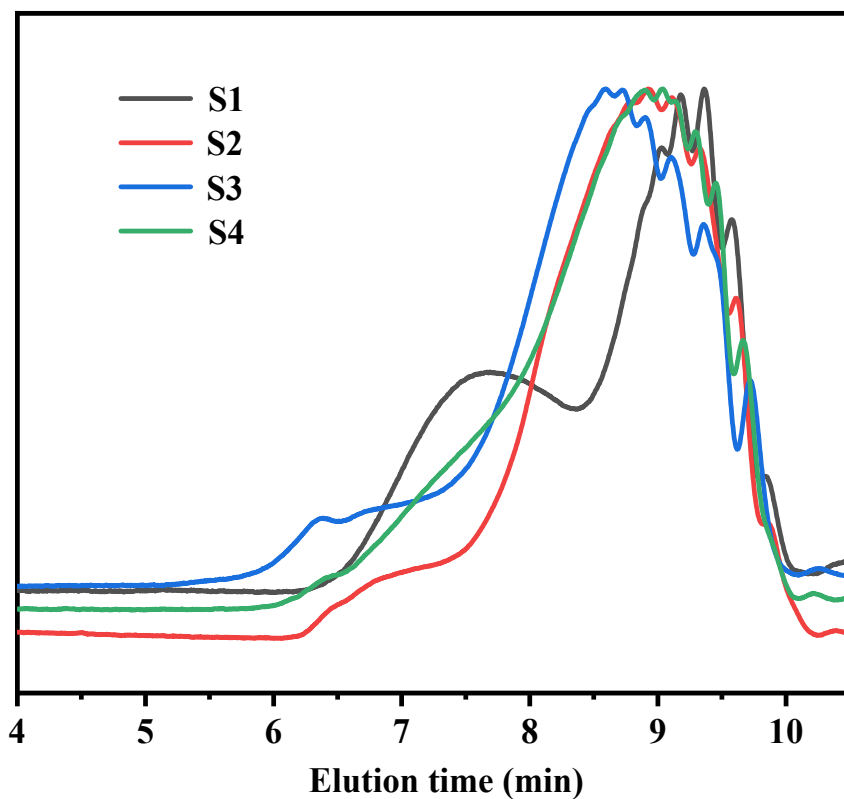

**Figure S17.** GPC curves of bipolymers S1-S4 shown in Table S3.

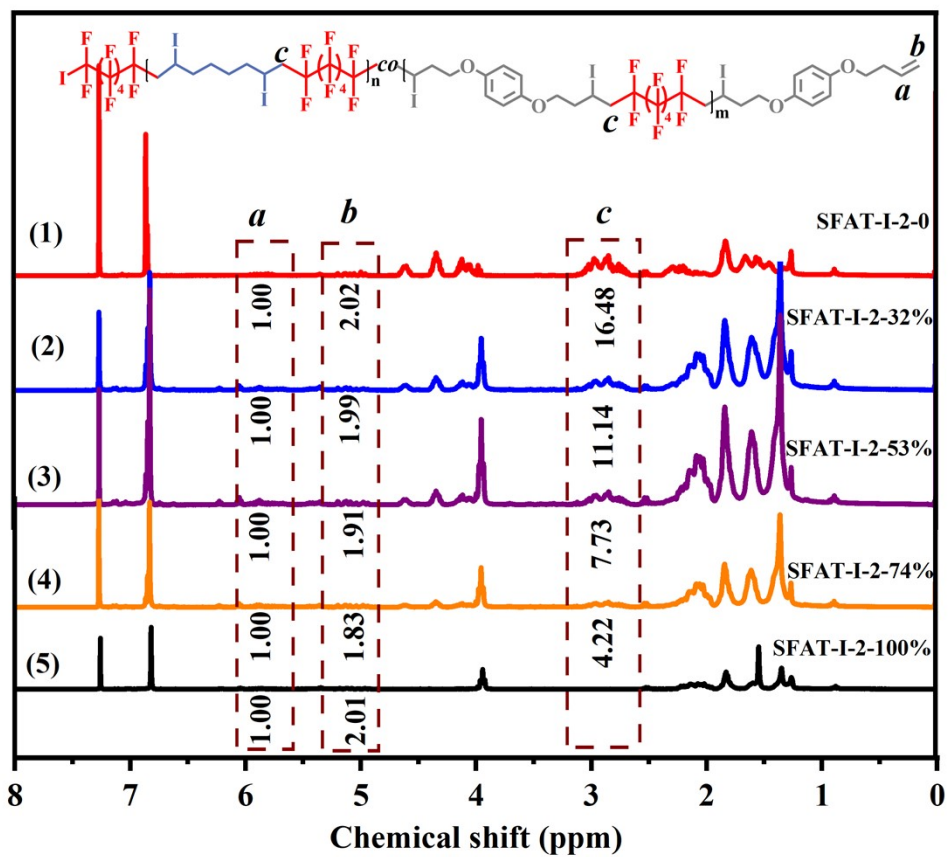

**Figure S18.**  $^1\text{H}$  NMR spectra of (1) SFAT-I-2-0, (2) SFAT-I-2-32%, (3) SFAT-I-2-53%, (4) SFAT-I-2-74% and (5) SFAT-I-2-100%.

## S4 References

- (1) Chen, W.; Mohy Ei Dine, T.; Vincent, S. P. Synthesis of functionalized copillar[4+1]arenes and rotaxane as heteromultivalent scaffolds. *Chem. Commun.* **2021**, 57, 492-495.
- (2) Takeuchi, Y.; Suzuki, Y.; Ono, F.; Manabe, K. Synthesis of 5,5,6,6,21,21,22,22-octamethyl - 5,6,21,22-tetragerma [10.10] paracyclophane. *J. Organomet. Chem.* **2003**, 678, 61-67.
